# Supplementary material
Source: PubMed Central journal article supplement (PMC4155419)
Supplement: Supp_Fig1.pdf [file Supp_Fig1.pdf]

## Supplementary Data

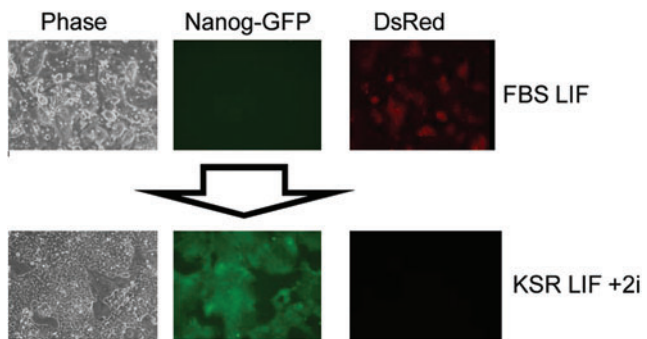

**SUPPLEMENTARY FIG. S1.** Florescence microscopic inspection of partial and genuine induced pluripotent stem cells (iPSCs) (5C5). Partial iPSCs (5C5) with (*lower panels*) or without (*upper panels*) exposure to the 2i condition for 6 days. Fluorescence images of the expression of *Nanog-GFP* (*green*) and retroviral *DsRed* (*red*) reporter genes are shown.
