# Supplementary material
Source: PubMed Central journal article supplement (PMC4155419)
Supplement: Supp_Fig2.pdf [file Supp_Fig2.pdf]

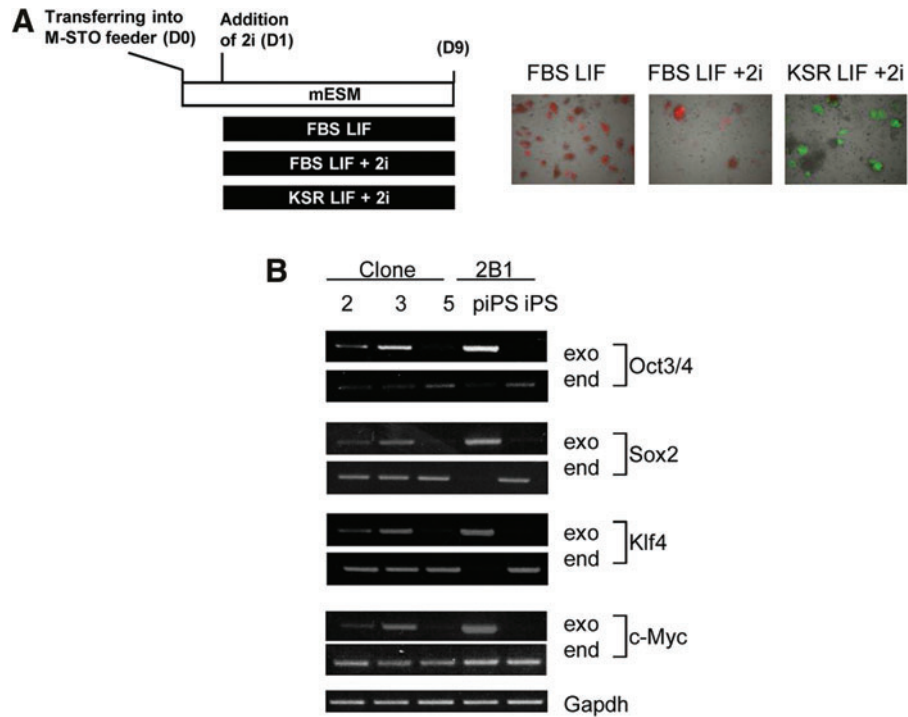

**SUPPLEMENTARY FIG. S2.** Culture conditions for conversion of partial to genuine iPSCs. **(A)** Serum completely abrogated 2i condition-mediated conversion of partial to genuine iPSCs. Partial iPSCs (2B1) maintained in the empirical mouse embryonic stem cell culture medium were exposed to the 2i condition with serum or knockout serum replacement for 6 days. Fluorescence images GFP and DsRed expression are overlaid. **(B)** Examination of endogenous (endo) and exogenous (exo) reprogramming gene expression by reverse transcription-PCR analyses in GFP-positive clones obtained by *piggyBac*-mediated genome-wide screening.
