# Supplementary material
Source: PubMed Central journal article supplement (PMC4155419)
Supplement: Supp_Fig4.pdf [file Supp_Fig4.pdf]

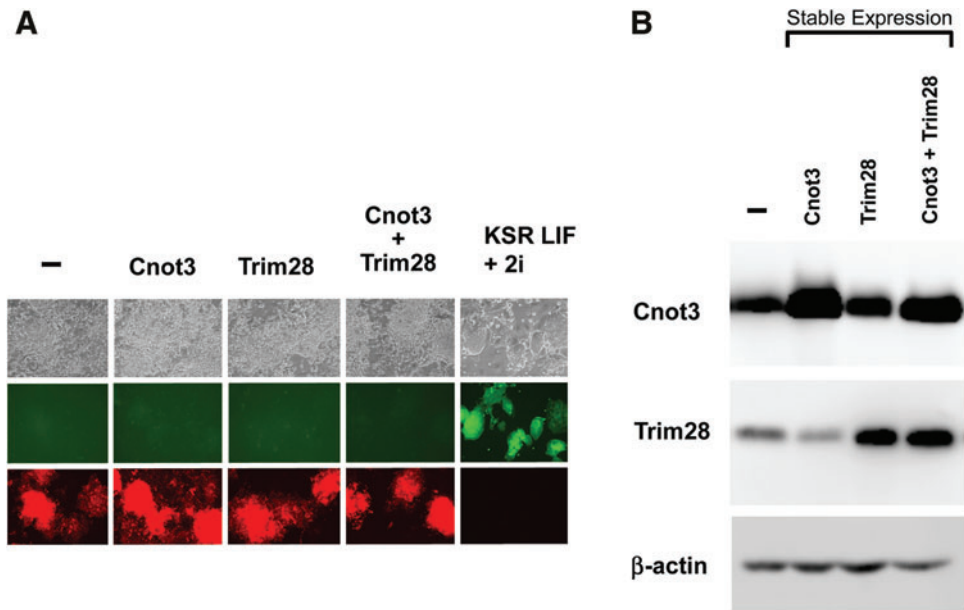

**SUPPLEMENTARY FIG. S4.** Expression of Cnot3 and/or Trim28 using the *piggyBac* vector system. **(A)** *PiggyBac* vectors carrying an expression unit for either Cnot3-IRES-hygromycin or Trim28-IRESneomycin resistance genes were introduced into partial iPSCs (2B1) individually or in combination together with a *piggyBac* transposase expression vector by lipofection. After stable integration, the cells were subjected to the 2i condition in which serum was used in place of KSR for 12 days. Then, images were obtained under a fluorescence microscope. **(B)** Western blot analyses to confirm the overexpression of Cnot3 and Trim28.
