# Supplementary material
Source: PubMed Central journal article supplement (PMC4155419)
Supplement: Supp_Fig5.pdf [file Supp_Fig5.pdf]

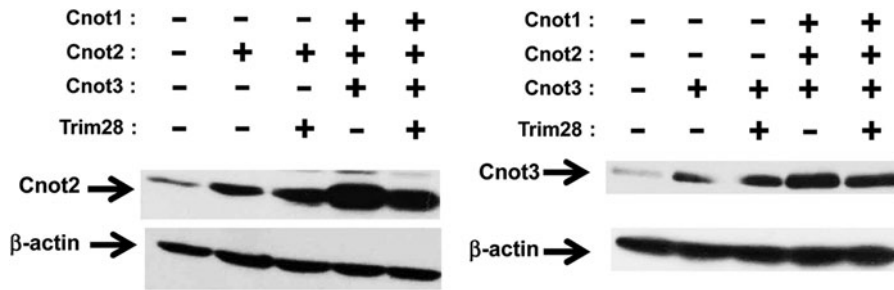

**SUPPLEMENTARY FIG. S5.** Western blot analyses of Cnot2 and Cnot3 in the presence or absence of other related factors. Retroviruses carrying Cnot1, Cnot2, Cnot3, or Trim28 were generated and used to infect partial iPSCs (2B1) individually or in combination as indicated. After stable integration of the vectors by antibiotic selection, whole-cell extracts were prepared to examine the levels of Cnot2 and Cnot3 by western blot analyses. Data for lanes 1 and 2 of each panel are also shown in Fig. 4.
