# Supplementary material
Source: PubMed Central journal article supplement (PMC4155419)
Supplement: Supp_Fig6.pdf [file Supp_Fig6.pdf]

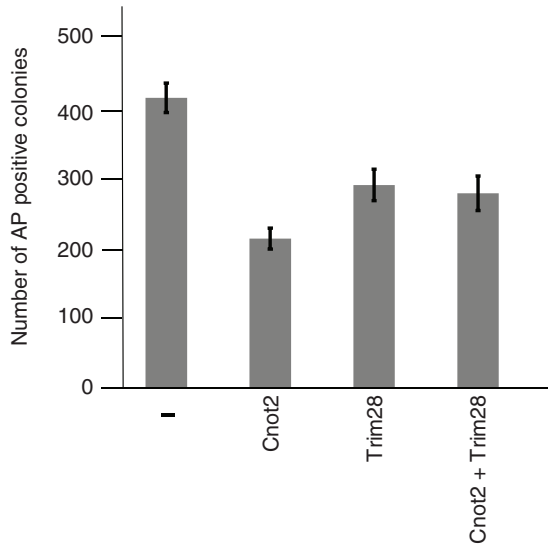

**SUPPLEMENTARY FIG. S6.** iPSC induction with Cnot2 and/or Trim28. Retroviruses carrying Cnot2 or Trim28 were produced in parallel with the four reprogramming factors (Oct3/4, Sox2, Klf4, and c-Myc). iPSC induction was conducted under the indicated conditions using mouse embryonic fibroblasts (MEFs) as starting somatic cells. All four reprogramming factors were included in all four different conditions at the same amounts. At 4 days post-infection,  $2 \times 10^5$  MEFs were transferred to a new dish with mitomycin C-treated feeder cells. At 12 days after transfer, the cells were subjected to alkaline phosphatase staining, and the stained cell colonies were counted under a light microscope.
