# Supplementary material
Source: PubMed Central journal article supplement (PMC4155419)
Supplement: Supp_Fig7.pdf [file Supp_Fig7.pdf]

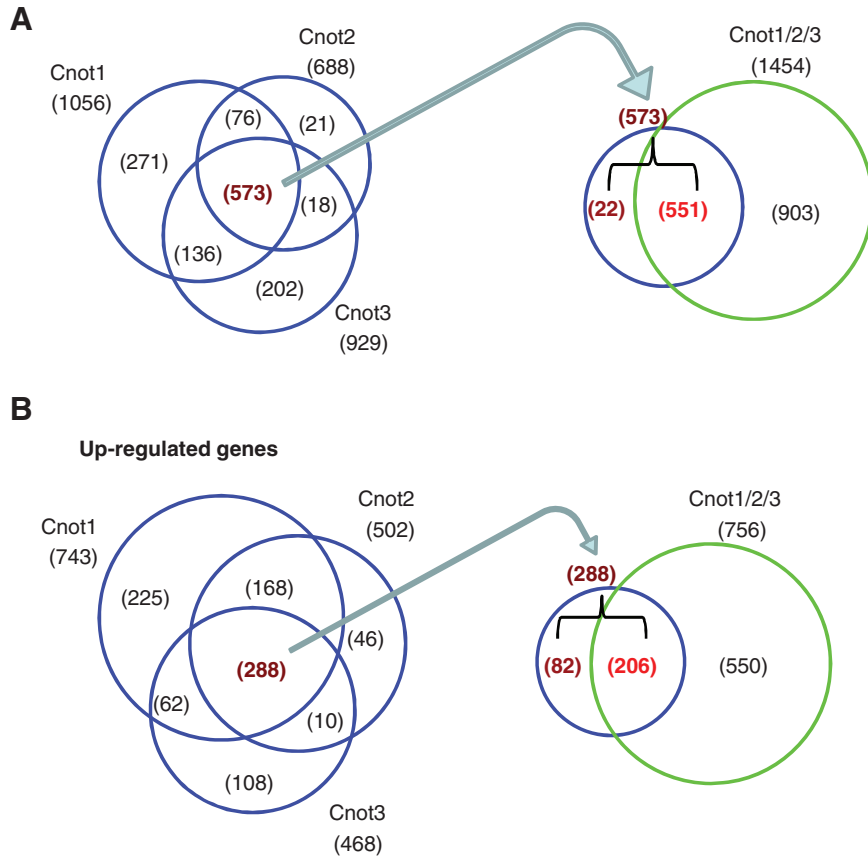

**SUPPLEMENTARY FIG. S7.** Venn diagrams illustrating the relationships of the effects of overexpression of core components of the Ccr4-Not complex on gene expression profiles of partial iPSCs. **(A)** Venn diagrams showing genes that were downregulated more than twofold by forced expression of Cnot1, Cnot2 or Cnot3 (*left panel*). *Right panel* shows the relationship between the 573 genes closed up in the *left panel* and those with expression levels that were decreased by simultaneous expression of Cnot1, Cnot2, and Cnot3 in partial iPSCs (2B1). **(B)** Genes upregulated by Cnot1, Cnot2, and Cnot3. *Left* and *right panels* show Venn diagrams subjected to the same procedure performed in **A** with respect to upregulated genes.
