# Supplementary material
Source: PubMed Central journal article supplement (PMC4155419)
Supplement: Supp_Fig8.pdf [file Supp_Fig8.pdf]

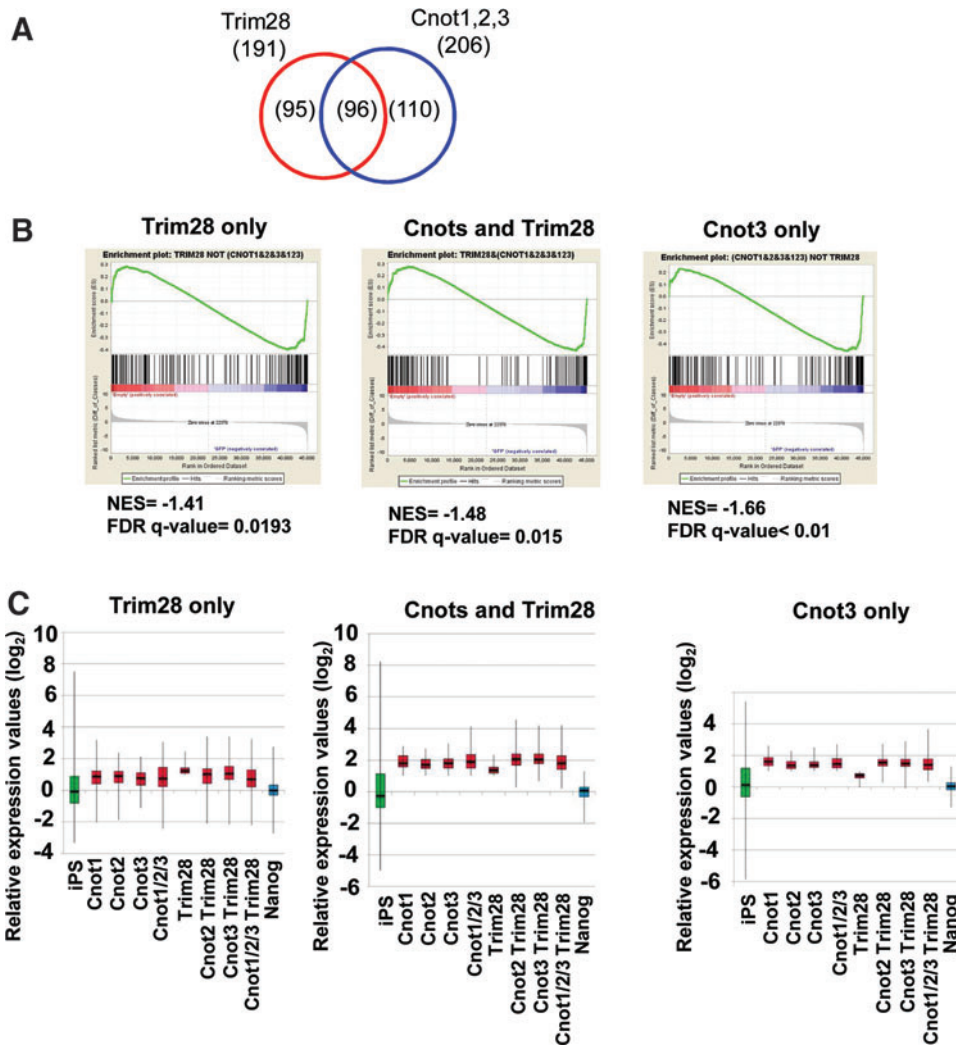

**SUPPLEMENTARY FIG. S8.** Characterization of genes upregulated by Ccr4-Not complex components and/or Trim28. **(A)** Venn diagram illustrating three groups of genes upregulated by Ccr4-Not complex components and Trim28 or specifically by either one in partial iPSCs (2B1). **(B)** The three groups of genes in **A** were subjected to gene set enrichment analyses as described in Fig. 4B to compare the expression profiles between partial and genuine iPSCs. **(C)** Box plot analyses of the expression of genes upregulated by core components of the Ccr4-Not complex and/or Trim28. Data are presented as described in Fig. 5C.
