# Supplementary material
Source: PubMed Central journal article supplement (PMC4155419)
Supplement: Supp_Table1.pdf [file Supp_Table1.pdf]

## Supplementary Table S1

### genes whose expression was modulated by Cnots and/or Trim28

| down-regulated genes                                         |                         |                                | up-regulated genes             |                       |                                                         |
|--------------------------------------------------------------|-------------------------|--------------------------------|--------------------------------|-----------------------|---------------------------------------------------------|
| Trim28 only <105>                                            | Cnots and Trim28 <211>  | Cnots only <341>               | Trim28 only <95>               | Cnots and Trim28 <96> | Cnots only <110>                                        |
| 2610024D14Rik                                                | 1110032F04Rik           | 1110032A04Rik                  | 1700007L15Rik /// LOC100502742 | 1700042O10Rik         | 1700109F18Rik                                           |
| 3110007F17Rik                                                | 1700029J07Rik           | 1700048O20Rik                  | 2310076G05Rik                  | 1810014B01Rik         | 2010001M09Rik                                           |
| 4931406C07Rik                                                | 1810019J16Rik           | 2010300C02Rik                  | 2810430I11Rik                  | 1810063B07Rik         | 2210404J11Rik                                           |
| 6330408A02Rik                                                | 2010107G23Rik           | 2210012G02Rik                  | 4932425I24Rik                  | 2410002O22Rik         | 3110002H16Rik                                           |
| 6430573F11Rik                                                | 2310011E23Rik           | 2310046K01Rik                  | A530047J11Rik                  | 2610300M13Rik         | 4930519F16Rik                                           |
| 8030474K03Rik                                                | 2610528A11Rik           | 2310057J16Rik                  | Adcy2                          | 2610305D13Rik         | 6030446N20Rik                                           |
| A030009H04Rik                                                | 2900072G11Rik           | 2410007B07Rik                  | Adh7                           | 4732490B19Rik         | A930004D18Rik                                           |
| Aass                                                         | 4632428N05Rik           | 2510009E07Rik                  | Al848100                       | 4921509J17Rik ///     | Actn1                                                   |
| Adck3                                                        | 4930506M07Rik           | 2810432L12Rik                  | Aknad1                         | A730082K24Rik         | Ada                                                     |
| Agpl3                                                        | 4930523C07Rik           | 2810468N07Rik                  | Ammecr1                        | Aadat                 | Adam23                                                  |
| Al845619                                                     | 6330403K07Rik           | 2900022M07Rik                  | Aoah                           | Acpp                  | Adamts7                                                 |
| Aldoc                                                        | A330076H08Rik           | 2900092E17Rik ///              | Apba1                          | Al448005              | Ak1                                                     |
| Angel2                                                       | Adamts12                | 2900092N22Rik                  | Areg                           | Al662270              | Akr1b8                                                  |
| Ankfy1                                                       | Adcy8                   | 3110039M20Rik                  | Arhgap28                       | Al956758              | Akr1c18                                                 |
| Apobec2                                                      | Adora2b                 | 3830612M24                     | Arx                            | Ano4                  | Apobec3                                                 |
| Arhgap23                                                     | Adrbk2                  | 4833406M21Rik                  | Asb7                           | Ap1s2                 | Atp6v1c1                                                |
| Atf3                                                         | Aim2                    | 5430421B17                     | Atp2b2                         | Arhgdib               | BC005512 /// F630007L15Rik /// Gm6958                   |
| B930012P20Rik                                                | Airn                    | 5730446D14Rik /// LOC100503966 | Bche                           | Arntl2                | Bcl2l2                                                  |
| Bach2                                                        | Als2                    | 5730492I20Rik                  | C030017B01Rik                  | Aspa                  | Ccdc158                                                 |
| BC037703                                                     | Amph                    | 5830474E16Rik                  | C78859                         | BC066028              | Cdc42ep1                                                |
| Bmf                                                          | Ankrd34b                | 8030445P17Rik                  | Car3                           | Bdnf                  | Cdkn2c                                                  |
| Btg2                                                         | Ano9                    | 8430427H17Rik                  | Cd36                           | Camk2d                | Cldn11                                                  |
| Cbx4                                                         | Aqp3                    | 9330118A15Rik                  | Chst11 /// Phactr1             | Car13                 | Clec2i                                                  |
| Ccdc69                                                       | Arc                     | 9430078K24Rik                  | Col3a1                         | Ccdc141               | Clock                                                   |
| Cd68                                                         | Arg1                    | A130078K24Rik                  | Cst9                           | Cd34                  | Ctnnd2                                                  |
| Cdkn2a                                                       | Arhgef16                | A730009E18Rik                  | Cul3                           | Cd80                  | D15Ert55e                                               |
| Cdbl                                                         | Atp1a2                  | A730090H04Rik                  | D430030G11Rik                  | Cdh11                 | Diras2                                                  |
| Cnksr1                                                       | AU040829                | Abca5                          | Dbc1                           | Cited1                | Dmrtc2                                                  |
| Crip1                                                        | BC068157                | Acsf6                          | Dgcr8                          | Cml3                  | Drd1a                                                   |
| Cspp1                                                        | Bcl11a                  | Adamts3                        | Ehf                            | Cryab                 | Drp2                                                    |
| Cyr61                                                        | Bcl11a /// LOC100503813 | Aim11                          | Eif4e3                         | Cyrr1                 | DXErt242e                                               |
| D730035F11Rik                                                | Bmp5                    | Akna                           | Enpp3                          | Ddc                   | Ebf3                                                    |
| D930017J03Rik                                                | Bzrap1                  | Aldh1a2                        | Fabp7                          | Dppa2                 | Eik3                                                    |
| D9Wsu90e                                                     | C130071C03Rik           | Ank2                           | Fam122b                        | Enpp1                 | Ephx1                                                   |
| Dhcr24                                                       | C530008M17Rik           | Anp32a                         | Flrt2                          | Exoc4                 | Eras                                                    |
| Dusp1                                                        | Cacnb2                  | Arhgap6                        | Flrt3                          | Fam154a               | Fbxo2                                                   |
| Edn2                                                         | Camk2n1                 | Arhgap8                        | Gabra2                         | Fam159b               | Gemin8                                                  |
| Egr1                                                         | Capsl                   | Armxc2                         | Gabrb3                         | Fam49a                | Gigyf2                                                  |
| Egr2                                                         | Casp7                   | Armxc3                         | Gap43                          | Fcgr2b                | Glod5                                                   |
| Egr3                                                         | Cbr2                    | Arrb1                          | Ggh                            | Fgf7                  | Gm10439 /// Gm15080 /// Gm15085 /// Gm15107 /// Gm15128 |
| Eif2ak2                                                      | Cbx8                    | Aspscr1                        | Glpr2                          | Folr1                 | Gpr37                                                   |
| Elf1                                                         | Ccbe1                   | Atf7ip2                        | Gm13139                        | Foxd1                 | Gss                                                     |
| Emp1                                                         | Ccdc109b                | Atp2a3                         | Gm5868 /// Slc10a4             | G530011O06Rik         | H2-Eb1                                                  |
| Epb4.1                                                       | Cd164I2                 | Atxn711                        | Gng3                           | Gm10482               | Hccs                                                    |
| Espn                                                         | Cd302                   | AW551984                       | Gvin1                          | Gm14005               | Hint3                                                   |
| F3                                                           | Cdc23                   | B4galnt2                       | H19                            | Gm8267                | Hoxb13                                                  |
| Fam110a                                                      | Cdca7l                  | Bai2                           | Herc3                          | Gpr114                | Hoxc4                                                   |
| Fam64a                                                       | Cdh10                   | Bai3                           | Hspa4l                         | Hba-a1 /// Hba-a2     | Hoxd10                                                  |
| Fam69b                                                       | Cdh4                    | Basp1                          | Huwe1                          | Herc6                 | Hoxd13                                                  |
| Fus                                                          | Ceacam1                 | Bckdha                         | Ifitm6                         | Hist2h2be             | Hoxd8                                                   |
| Gsdmd                                                        | Cfh                     | Bex1                           | Kctd12b                        | Hmgcll1               | Hoxd9                                                   |
| Hist1h4a /// Hist1h4b /// Hist1h4f /// Hist1h4i /// Hist1h4m | Chrna7                  | Bex2                           | Kctd8                          | Hoxd4                 | Htra1                                                   |
| Hmgcs1                                                       | Cldn3                   | Bex4                           | Klf12                          | Il6                   | Ido1                                                    |
| Id3                                                          | Cldn4                   | Bhlhe22                        | Klf5                           | Il7                   | Il6ra                                                   |
| Ier5l                                                        | Cldn7                   | Bicd1                          | Klhdc10                        | Itga6                 | Inf2                                                    |
| Insig1                                                       | Cldn9                   | Bmp2                           | Ldb2                           | Jam2                  | Insc                                                    |
| Jun                                                          | Clip4                   | Bnc2                           | Lix1                           | Kcnk13                | Kalrn                                                   |
| Kcnf1                                                        | Cox7a1                  | Bspry                          | Lrrc8d                         | Kpna7                 | Kif5b                                                   |
| Kcnu1                                                        | Crabp2                  | C030034E14Rik                  | Mansc1                         | Lama1                 | Krt13                                                   |
| Kit                                                          | Ctsf                    | C130057M05Rik                  | Mobp                           | Lifr                  | Laptm5                                                  |
| Klf2                                                         | Cttnbp2                 | C1ql3                          | Napb                           | Limch1                | Loxl3                                                   |

|                    |          |                     |                              |                                                                                         |                |
|--------------------|----------|---------------------|------------------------------|-----------------------------------------------------------------------------------------|----------------|
| Klh10              | Cyip2    | C1qtnf2             | Nat8l                        | Ln timer                                                                                | Lpcat1         |
| Klh8               | Dmrt1    | Cables1             | Neo1                         | Ly6g6d                                                                                  | Lymr1          |
| Klk1b22 /// Klk1b9 | Dpyd     | Cacna2d1            | Nmnat2                       | Mbp                                                                                     | Mbtps2 /// Yy2 |
| Krt17              | Efcab1   | Calcr1              | Pcsk1                        | Msc                                                                                     | Mcam           |
| Ldlr               | Ehhadh   | Calml4              | Phactr1                      | Naprt1                                                                                  | Mcf2l          |
| LOC74457           | Enkur    | Camk1d              | Phgdh                        | Nat8                                                                                    | Mdfic          |
| Macrodl            | Epcam    | Car2                | Pla2g4a                      | Ncam1                                                                                   | Mfap3l         |
| Mapk6              | Evpl     | Ccdc112             | Pla2r1                       | Nexn                                                                                    | Mid1           |
| Mrip               | Fads6    | Ccdc122             | Pr12c2 /// Pr12c3 /// Pr12c4 | Npm3 /// Npm3-ps1                                                                       | Mreg           |
| Mt1                | Fam171a2 | Ccdc91              | Prss35                       | Nr0b1                                                                                   | Myof           |
| Nek1               | Fgf9     | Ccnjl               | Ptpn22                       | Nudt7                                                                                   | Npepl1         |
| Neo1               | Fhit     | Cd99                | Rab39b                       | Pak3                                                                                    | Nppb           |
| Nfe2l3             | Fhl1     | Cdh1                | Rbms3                        | Parvb                                                                                   | Nr5a2          |
| Ninl               | Flt1     | Cdh9                | Rhbdd1                       | Pdcl2                                                                                   | Ociad2         |
| Nol3               | Fndc1    | Cdhr1               | Rnf13                        | Pkp2                                                                                    | Olfm1          |
| Nr4a2              | Fosb     | Cdkl2               | Runx111                      | Pla2g7                                                                                  | Pax3           |
| Phf21a             | Foxa1    | Cdon                | Runx2                        | Prss41                                                                                  | Pdzm3          |
| Ppil6              | Foxg1    | Ceacam1 /// Ceacam2 | Sema3e                       | Rgs7                                                                                    | Pfn2           |
| Prokr1             | Foxj1    | Cebpa               | Sema6d                       | Riok3                                                                                   | Pid1           |
| Pstpip2            | Foxp2    | Celsr1              | Sgol2                        | Sdpr                                                                                    | Pld6           |
| Rbm39              | Fzd2     | Chdh                | Sgtb                         | Sectm1a                                                                                 | Plekha2        |
| Rpp25              | Galnt12  | Chst2               | Slc7a11                      | Serpine2                                                                                | Plxdc2         |
| Rsad2              | Gas1     | Ckmt1               | Slc7a8                       | Sh3rf2                                                                                  | Podxl          |
| Scn2a1             | Gatm     | Cmtm8               | Slc9a2                       | Slc13a5                                                                                 | Ppp1r14a       |
| Sh3bgr             | Gcnt3    | Cntln               | Sox6                         | Slc5a9                                                                                  | Prdx4          |
| Sh3gl2             | Gcom1    | Crb3                | Spnb2                        | Stx11                                                                                   | Prps1          |
| Slc46a1            | Gfra1    | Cryl1               | St6gal2                      | Them5                                                                                   | Rbm12b         |
| Smad6              | Gli2     | Csrp2               | Sulf1                        | Tmprss5                                                                                 | Rbp1           |
| Smad7              | Glis3    | Cxxc4               | Taf9b                        | Trpc6                                                                                   | Rnf39          |
| Spag9              | Glr1b    | Cyp4a10 /// Cyp4a31 | Tcfap2d                      | Tshz3                                                                                   | Runx1          |
| Spry3              | Gm12606  | D3Ertid751e         | Tmem47                       | Tll13                                                                                   | Smurf1         |
| Ssbp3              | Gnai1    | Dab1                | Tspyl4                       | Ugt1a1 /// Ugt1a10 /// Ugt1a2 /// Ugt1a5 /// Ugt1a6a /// Ugt1a6b /// Ugt1a7c /// Ugt1a9 | Srp54b         |
| Tbc1d24            | Gng13    | Dach2               | Tubb3                        | Vat1l                                                                                   | Steap4         |
| Tfdp2              | Gng4     | Ddx43               | Wdr37                        | Vnn1                                                                                    | Syap1          |
| Tmem146            | Grb7     | Dennd5b             |                              | Zmat4                                                                                   | Syce2          |
| Tmem191c           | Heph     | Dlx4                |                              |                                                                                         | Tcfap2c        |
| Tmtc2              | Hoxa5    | Doc2b               |                              |                                                                                         | Tead4          |
| Tob1               | Ica1     | Dock3               |                              |                                                                                         | Tex15          |
| Ube3a              | Ifi2712a | Dusp4               |                              |                                                                                         | Tm4sf1         |
| Uhrf2              | Igf1bp2  | Ebf4                |                              |                                                                                         | Tmem159        |
| Zdhhc20            | Igfbp2   | Efnb1               |                              |                                                                                         | Tmem2          |
| Zfp286             | Irs3     | Efnb2               |                              |                                                                                         | Tmem43         |
| Zfp36              | Irx3     | Efs                 |                              |                                                                                         | Tnfsf11        |
| Zfp768             | Itgb7    | Elmo3               |                              |                                                                                         | Tspan12        |
|                    | Katnal2  | Elovl7              |                              |                                                                                         | Ttyh2          |
|                    | Kbtbd11  | Emx2                |                              |                                                                                         | Ube2m          |
|                    | Kbtbd7   | Eomes               |                              |                                                                                         | Upp1           |
|                    | Kcnd2    | Epha4               |                              |                                                                                         | Zfp365         |
|                    | Kcnj8    | Erdr1               |                              |                                                                                         | Zrsr2          |
|                    | Kcnk1    | Esrp1               |                              |                                                                                         |                |
|                    | Kctd12   | Exph5               |                              |                                                                                         |                |
|                    | Khdrbs3  | Fam129a             |                              |                                                                                         |                |
|                    | Kif27    | Fam19a4             |                              |                                                                                         |                |
|                    | Klf4     | Fam20a              |                              |                                                                                         |                |
|                    | Klk1     | Fam46a              |                              |                                                                                         |                |
|                    | Krt14    | Fam84b              |                              |                                                                                         |                |
|                    | Krt20    | Farp1               |                              |                                                                                         |                |
|                    | Krt8     | Fbn1                |                              |                                                                                         |                |
|                    | Lad1     | Fbxl7               |                              |                                                                                         |                |
|                    | Lgals9   | Fert2               |                              |                                                                                         |                |
|                    | Lgi2     | Fjx1                |                              |                                                                                         |                |
|                    | Lhx2     | Fmn1                |                              |                                                                                         |                |
|                    | Lor      | Fndc3c1             |                              |                                                                                         |                |
|                    | Lpar1    | Foxc1               |                              |                                                                                         |                |
|                    | Lrrc31   | Foxc2               |                              |                                                                                         |                |
|                    | Lypd2    | Fras1               |                              |                                                                                         |                |
|                    | Mamdc2   | Frem2               |                              |                                                                                         |                |
|                    | Map2k6   | Frk                 |                              |                                                                                         |                |
|                    | Mdga2    | Fzd4                |                              |                                                                                         |                |
|                    | Micalcl  | Gca                 |                              |                                                                                         |                |
|                    | Mipol1   | Gdf3                |                              |                                                                                         |                |
|                    | Mif1     | Ggt1                |                              |                                                                                         |                |
|                    | Mmp16    | Gjc1                |                              |                                                                                         |                |
|                    | Mmp2     | Glcci1              |                              |                                                                                         |                |

|            |              |
|------------|--------------|
| Mmp20      | Gm11818      |
| Msln       | Gm15698      |
| Mtss1      | Gm347        |
| Myo5c      | Gm5089       |
| Ncrna00086 | Gm5124       |
| Nefh       | Gm5480       |
| Nell1      | Gpc3         |
| Nfatc4     | Gpr98        |
| Nhsl2      | Grb10        |
| Nkx1-2     | Gsx1         |
| Npr3       | Gtf2ird2     |
| Nrk        | Gypc         |
| Nudt10     | H1f0         |
| P2rx3      | H2-BI        |
| Pabpc4l    | Hhip         |
| Pard3b     | Hist3h2ba    |
| Pax6       | Homer2       |
| Pcdh8      | Hook1        |
| Pclo       | Hopx         |
| Peli1      | Hoxa3        |
| Phlda2     | Hs6st2       |
| Phyhipl    | Hsd17b11     |
| Plbd1      | Hspa12a      |
| Ppl        | Ifrd2        |
| Ppp1r13b   | Igf2r        |
| Prkcb      | Igfbp3       |
| Prokr2     | Igsf8        |
| Prph       | Il1rap       |
| Ptprd      | Ina          |
| Ptpru      | Inadl        |
| Ptprz1     | Iqsec3       |
| Rab11fip4  | Irf6         |
| Rasa4      | Irx5         |
| Rasgef1b   | Isl1         |
| Rassf10    | Itga3        |
| Rassf6     | Itga9        |
| Rbm24      | Kcnj9        |
| Rfx2       | Kcnt2        |
| Rnf157     | Kcnv1        |
| Rsph4a     | Klhl13       |
| Sfn        | Klhl22       |
| Sfrp2      | Klhl23       |
| Six3       | Klk8         |
| Slain1     | Krt19        |
| Slc19a3    | Kynu         |
| Slc1a3     | Lama3        |
| Smarca1    | Ldb2         |
| Snca       | Lect1        |
| Sorl1      | Leprel1      |
| Sox3       | Lgr5         |
| Stx3       | Lhx9         |
| Stxbp6     | LOC100038746 |
| Susd4      | LOC100502594 |
| Syt14      | Lonrf3       |
| Tcea3      | Lpar4        |
| Tgfb2      | Lphn2        |
| Timp3      | Lrch2        |
| Tppp3      | Lrmp         |
| Trim25     | Lrrc34       |
| Tspan13    | Lsr          |
| Ucn3       | Mal2         |
| Ugt8a      | Mall         |
| Upk1b      | Marveld3     |
| Vav3       | Mbnl3        |
| Vill       | Mctp2        |
| W91776     | Mdfi         |
| Xist       | Med1         |
| Xylt2      | Med12l       |
| Zbtb12     | Mef2c        |
| Zcchc18    | Meis2        |
| Zcchc3     | Mgat3        |
| Zfp354b    | Mgat4c       |
| Zfp46      | Mpdz         |
| Zfp703     | Mrc2         |
| Zxda       | Mtap2        |
|            | Myb          |
|            | Myh10        |
|            | Myo1g        |

|          |
|----------|
| Nap1l2   |
| Narf     |
| Nccrp1   |
| Nppc     |
| Nptx1    |
| Nr3c1    |
| Nrip1    |
| Nts      |
| Nudt11   |
| Odz2     |
| Odz3     |
| Odz4     |
| Onecut2  |
| Park2    |
| Parm1    |
| Parp8    |
| Parva    |
| Pcbp3    |
| Pcolce   |
| Pcsk6    |
| Pctp     |
| Pde2a    |
| Pdpm     |
| Pex5l    |
| Plac8    |
| Plcg2    |
| Plcl1    |
| Plcl2    |
| Plek2    |
| Plekha6  |
| Plekhg6  |
| Pnma2    |
| Pof1b    |
| Pogk     |
| Porcn    |
| Ppbp     |
| Ppp1r3b  |
| Ppp2r3a  |
| Prdm11   |
| Prkca    |
| Prkch    |
| Psd3     |
| Ptger4   |
| Ptprg    |
| Ptprm    |
| Pycard   |
| Rab25    |
| Rab27a   |
| Rab38    |
| Rapgef5  |
| Rarb     |
| Rassf9   |
| Rcbtb2   |
| Rcn3     |
| Ripk4    |
| Rnf130   |
| Rnf144a  |
| Rragd    |
| Rtn4rl2  |
| Rundc3b  |
| Runx3    |
| Scarf2   |
| Selenbp1 |
| Sema5b   |
| Sfrp1    |
| Sh3d19   |
| Sh3gl3   |
| Six1     |
| Slc16a2  |
| Slc16a7  |
| Slc35f1  |
| Slc6a14  |
| Slc6a15  |
| Sliitrk4 |
| Snap91   |
| Sntg1    |
| Sox4     |
| Sox9     |

|              |
|--------------|
| Spata13      |
| Spint2       |
| Spr1a        |
| Spsb4        |
| Srgap3       |
| St6galnac2   |
| Stat4        |
| Stk39        |
| Stx18        |
| Synpo        |
| Syt7         |
| Tbx4         |
| Tcf15        |
| Tcf7         |
| Tcfl5        |
| Tchh         |
| Thbs1        |
| Tie1         |
| Tmem176a     |
| Tmem181a /// |
| Tmem181b-ps  |
| Tmem56       |
| Tnk1         |
| Tnrc6c       |
| Trim2        |
| Trim44       |
| Trim47       |
| Trpc4        |
| Tshz2        |
| Tspan6       |
| Ttc8         |
| Tll11        |
| Twist1       |
| Ube2ql1      |
| Unc13b       |
| Unc5d        |
| Vstm2a       |
| Wdr41        |
| Wfdc2        |
| Wls          |
| Zfx4         |
| Zfp12        |
| Zfp146       |
| Zfp2         |
| Zfp423       |
| Zfp503       |
| Zfp521       |
| Zfp629       |
| Zfp827       |
| Zfp882       |
| Zmiz1        |
